# Supplementary material for: Chemical bonding-induced rich electronic properties of oxygen adsorbed few-layer graphenes
Source: Royal Society of Chemistry journal article supplement (doi:10.1039/c5cp06897e), 2016-01-01
Supplement: c5cp06897e1.pdf [file c5cp06897e1.pdf]

## **Electronic Supplementary Information (ESI)**

# **Chemical Bondings-Induced Rich Electronic Properties of Oxygen Adsorbed Few-layer Graphenes**

Ngoc Thanh Thuy Tran, Shih-Yang Lin, Yu-Tsung Lin, and Ming-Fa Lin\*

*Department of Physics, National Cheng Kung University, Tainan 701, Taiwan*

E-mail: mflin@mail.ncku.edu.tw

Phone: +886-6-275-7575. Fax: +886-6-2747995

---

\*To whom correspondence should be addressed

Table S1. The calculated adsorption energy, binding energy, O-O interaction energy and energy gap of GO with various oxygen concentrations.

| O Concentration               | Adsorption energy (eV) | Binding energy (eV) | O-O interaction energy (eV) | Energy gap (eV) |
|-------------------------------|------------------------|---------------------|-----------------------------|-----------------|
| 50% (single-side, zigzag)     | -2.9390                | -4.4651             | 1.5262                      | 3.54            |
| 50% (single-side, armchair)   | -2.4258                | -4.0943             | 1.6686                      | 2.83            |
| 50% (single-side, chiral)     | -2.6052                | -4.2957             | 1.6905                      | 3.92            |
| 33.3% (single-side, armchair) | -2.3728                | -3.7433             | 1.3705                      | 2.53            |
| 25% (single-side, zigzag)     | -2.3515                | -3.6509             | 1.2995                      | 0.63            |
| 50% (both-side, zigzag)       | -4.4079                | -4.8622             | 0.4543                      | 3.14            |
| 33.3% (both-side, armchair)   | -4.3919                | -4.6682             | 0.2763                      | 2.47            |
| 25% both-side, zigzag)        | -4.2676                | -4.5079             | 0.2403                      | 0.17            |

The adsorption energy is defined as

$$E_{ad} = (E_{sys} - E_{gra} - E_{oxy})/n \quad (1)$$

where  $E_{sys}$ ,  $E_{gra}$ , and  $E_{oxy}$  are the total energies of the GO system, the graphene sheet, and the oxygen cluster of  $n$  atoms, respectively.

The binding energy is defined as

$$E_b = (E_{sys} - E_{gra} - nE_O)/n \quad (2)$$

where  $E_O$  is the total energy of an isolated O atom.

The O-O interaction is characterized by the energy difference between  $E_{ad}$  and  $E_b$ .

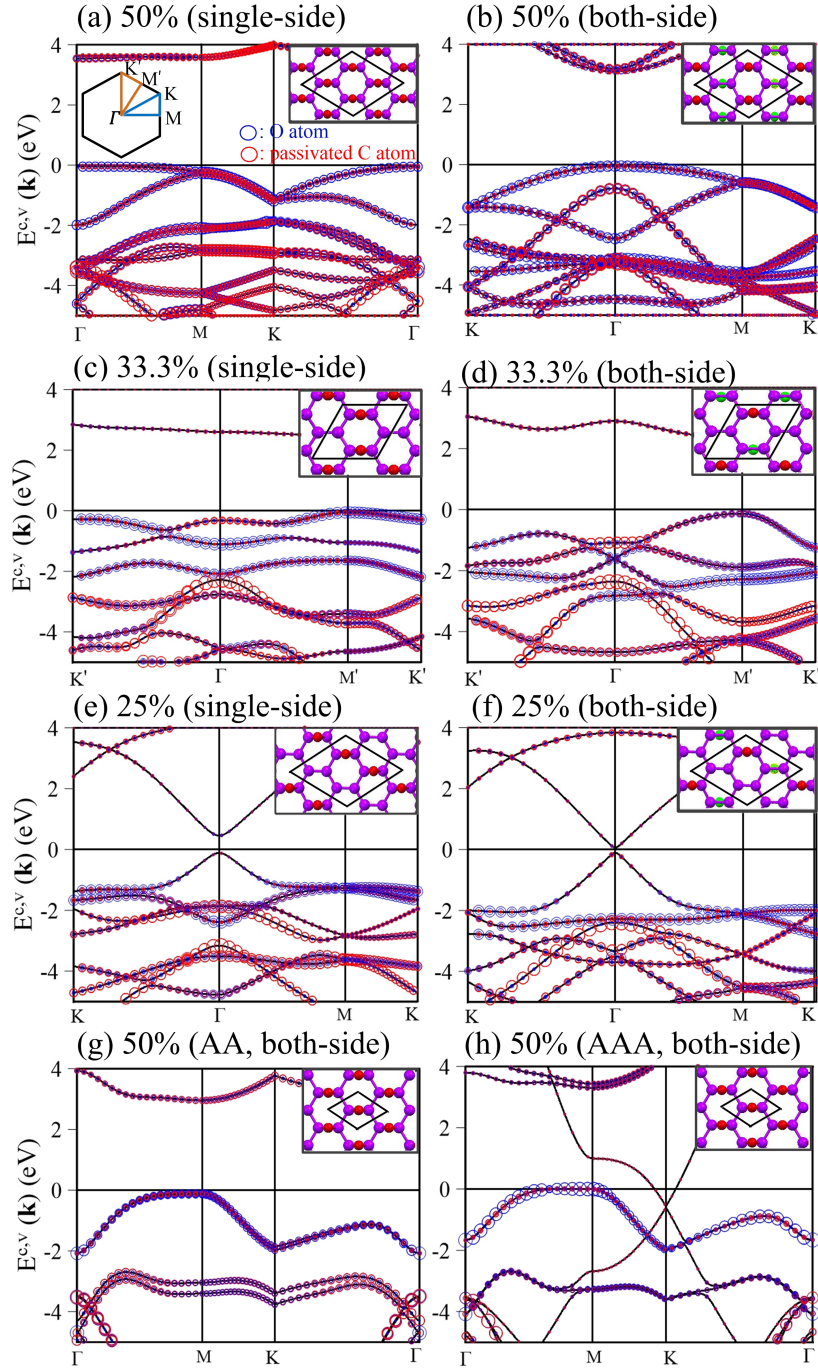

Figure S1. Band structures of GO with the oxygen concentration of: (a) 50% (single-side), (b) 50% (both-side), (c) 33.3% (single-side), (d) 33.3% (both-side), (e) 25% (single-side), (f) 25% (both-side), (g) 50% (AA, both-side), and (h) 50% (AAA, both-side). The red and green atoms represent the top- and bottom-adsorption of O atoms on graphenes, respectively.

(a) Charge density  
(50%, both-side)

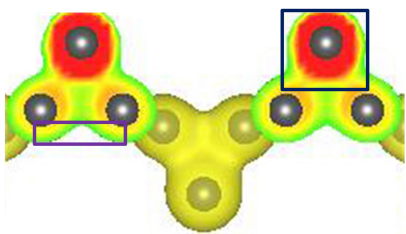

(c) Charge density difference  
(50%, both-side)

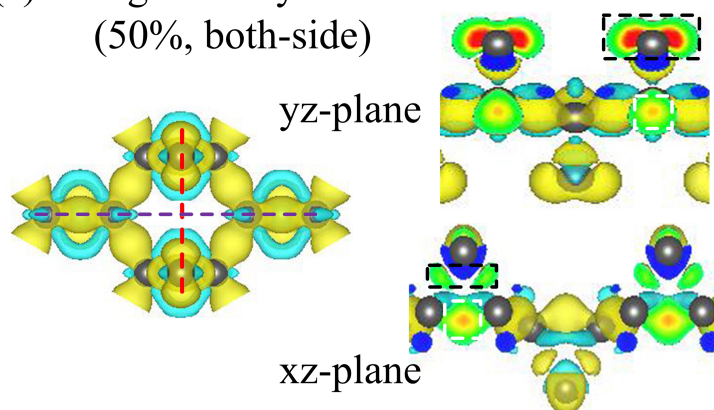

(b) Charge density  
(25%, both-side)

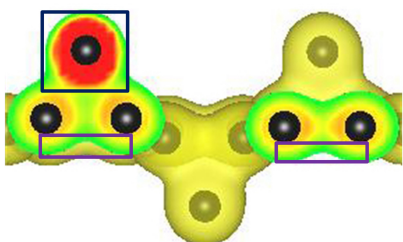

(d) Charge density difference  
(25%, both-side)

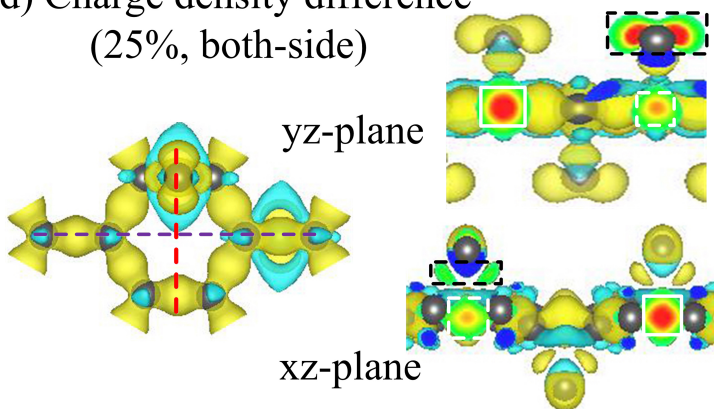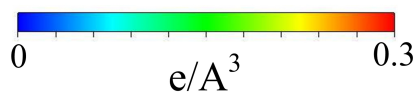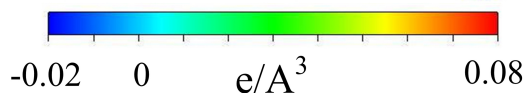

Figure S2. The charge density of (a) 50% (both-side), and (b) 25% (both-side). The charge density difference in yz- and xz-planes of (c) 50% (both-side), and (d) 25% (both-side).
